# Supplementary material for: Analysis of positive and negative allosteric modulation in metabotropic glutamate receptors 4 and 5 with a dual ligand
Source: PubMed Central journal article supplement (PMC5504000; doi:10.1038/s41598-017-05095-5), 2017-07-10
Supplement: 41598_2017_5095_MOESM1_ESM.pdf [file 41598_2017_5095_MOESM1_ESM.pdf]

## Analysis of positive and negative allosteric modulation in metabotropic glutamate receptors 4 and 5 with a dual ligand

James A.R. Dalton<sup>1</sup>, Jean-Philippe Pin<sup>2,3</sup>, Jesús Giraldo<sup>1,\*</sup>

<sup>1</sup> Laboratory of Molecular Neuropharmacology and Bioinformatics, Institut de Neurociències and Unitat de Bioestadística, Universitat Autònoma de Barcelona, 08193 Bellaterra, Spain; Network Biomedical Research Centre on Mental Health (CIBERSAM), Spain.

<sup>2</sup> Institute of Functional Genomics, Université de Montpellier, Unité Mixte de Recherche 5302 CNRS, Montpellier, France.

<sup>3</sup> Unité de recherche U1191, INSERM, Montpellier, France.

### Supplementary Information

```

mglu4 1  I P I I K L E W G S P W A V L P L F L A V V G I A A T L F V V I T F V R Y N D T P I V K A S G R E L S Y V L L A G I F L
mglu5 1  I P V Q Y L R W G D P E P I A A V V F A C L G L L A T L F V T V V F I I Y R D T P V V K S S S R E L C Y I I L A G I C L

mglu4 61  C Y A T T F L M I A E P D L G T C S L R R I F L G L G M S I S Y A A L L T K T N R I Y R I F E Q G K R S V -- S A P R F
mglu5 61  G Y L C T F C L I A K P K Q I Y C Y L Q R I G I G L S P A M S Y S A L V T K T N R I A R I L A G S K K K I C T K K P R F

mglu4 119 I S P A S Q L A I T F S L I S L Q L L G I C V W F V V D P S H S V V D F Q D Q R T L D P R F A R G V L K C D I S D L S L
mglu5 121 M S A C A Q L V I A F I L I C I Q L G I I V A L E I M E P P D I M H D Y P S I R ----- E V Y L I C N T T N L G V

mglu4 179 I C L L G Y S M L L M V T C T V Y A I K T R G V P E T F N E A K P I G F T M Y T T C I V W L A F I P I F E G T S O S A D
mglu5 174 V T P L G Y N G L L I L S C T F Y A F K T R N V P A N E F N E A K Y I A F T M Y T T C I I W L A F V P I Y F G S N Y ---

mglu4 239 K L Y I Q T T F L T V S V S L S A S V S L G M L Y M P K V Y I I L F H P E Q N
mglu5 231 ---- K I I T M C F S V S L S A T V A L G C M F V P K V Y I I L A K P E R N
    
```

**SI Figure 1.** Sequence alignment between transmembrane domains of human mGlu4 and mGlu5.

**SI Table 1.** Predicted docking scores (from Autodock4.2) of MPEP in mGlu4 homology model and mGlu5 crystal structure (PDB id: 4O09)

|                                                                                | mGlu5 | mGlu4 |
|--------------------------------------------------------------------------------|-------|-------|
| <b>Predicted docking score</b><br>(estimated free energy of binding, kcal/mol) | -7.32 | -6.96 |

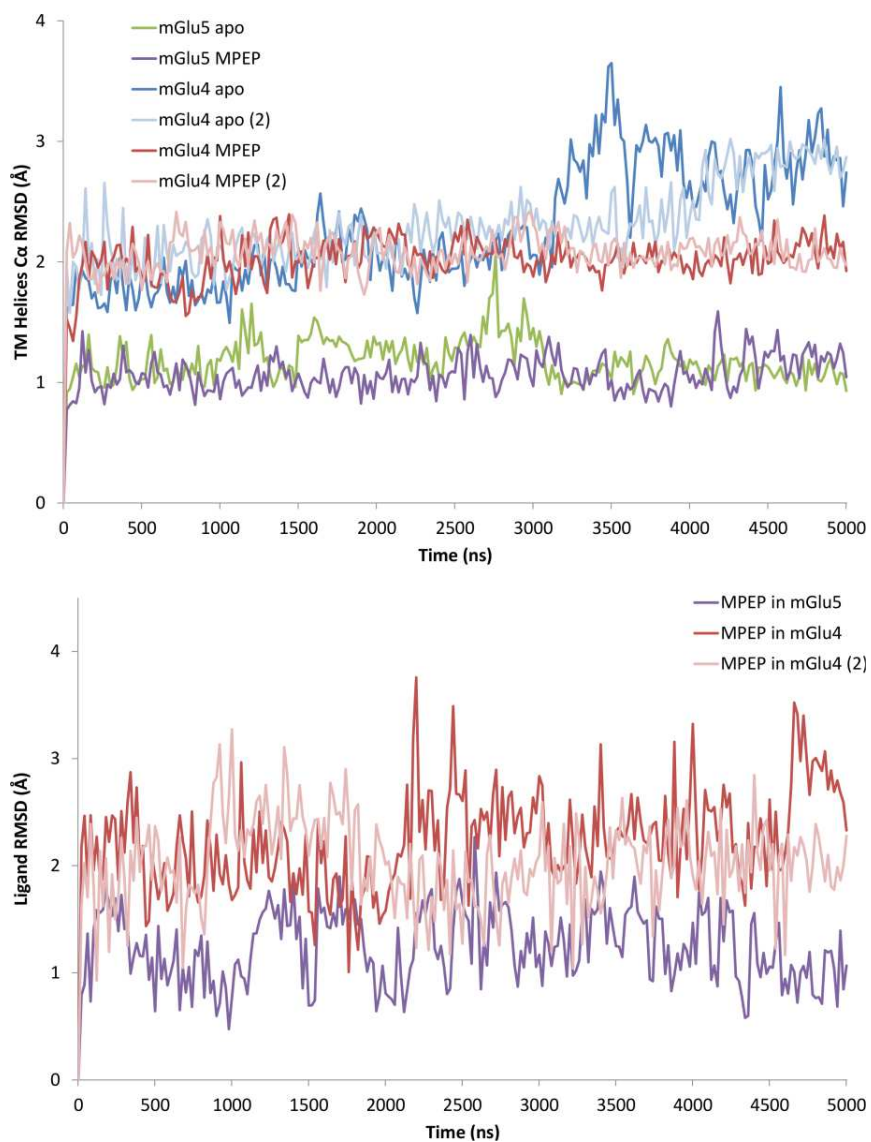

**SI Figure 2.** Top: RMSD of mGlu4 and mGlu5 transmembrane domains (C $\alpha$  atoms of TM helices) in apo and MPEP-bound states in respective 5-microsecond MD simulations (calculated with respect to starting protein structure). MD simulations of mGlu4 are duplicated. Bottom: RMSD of allosteric modulator MPEP, bound in mGlu4 and mGlu5 (calculated with respect to original docking).

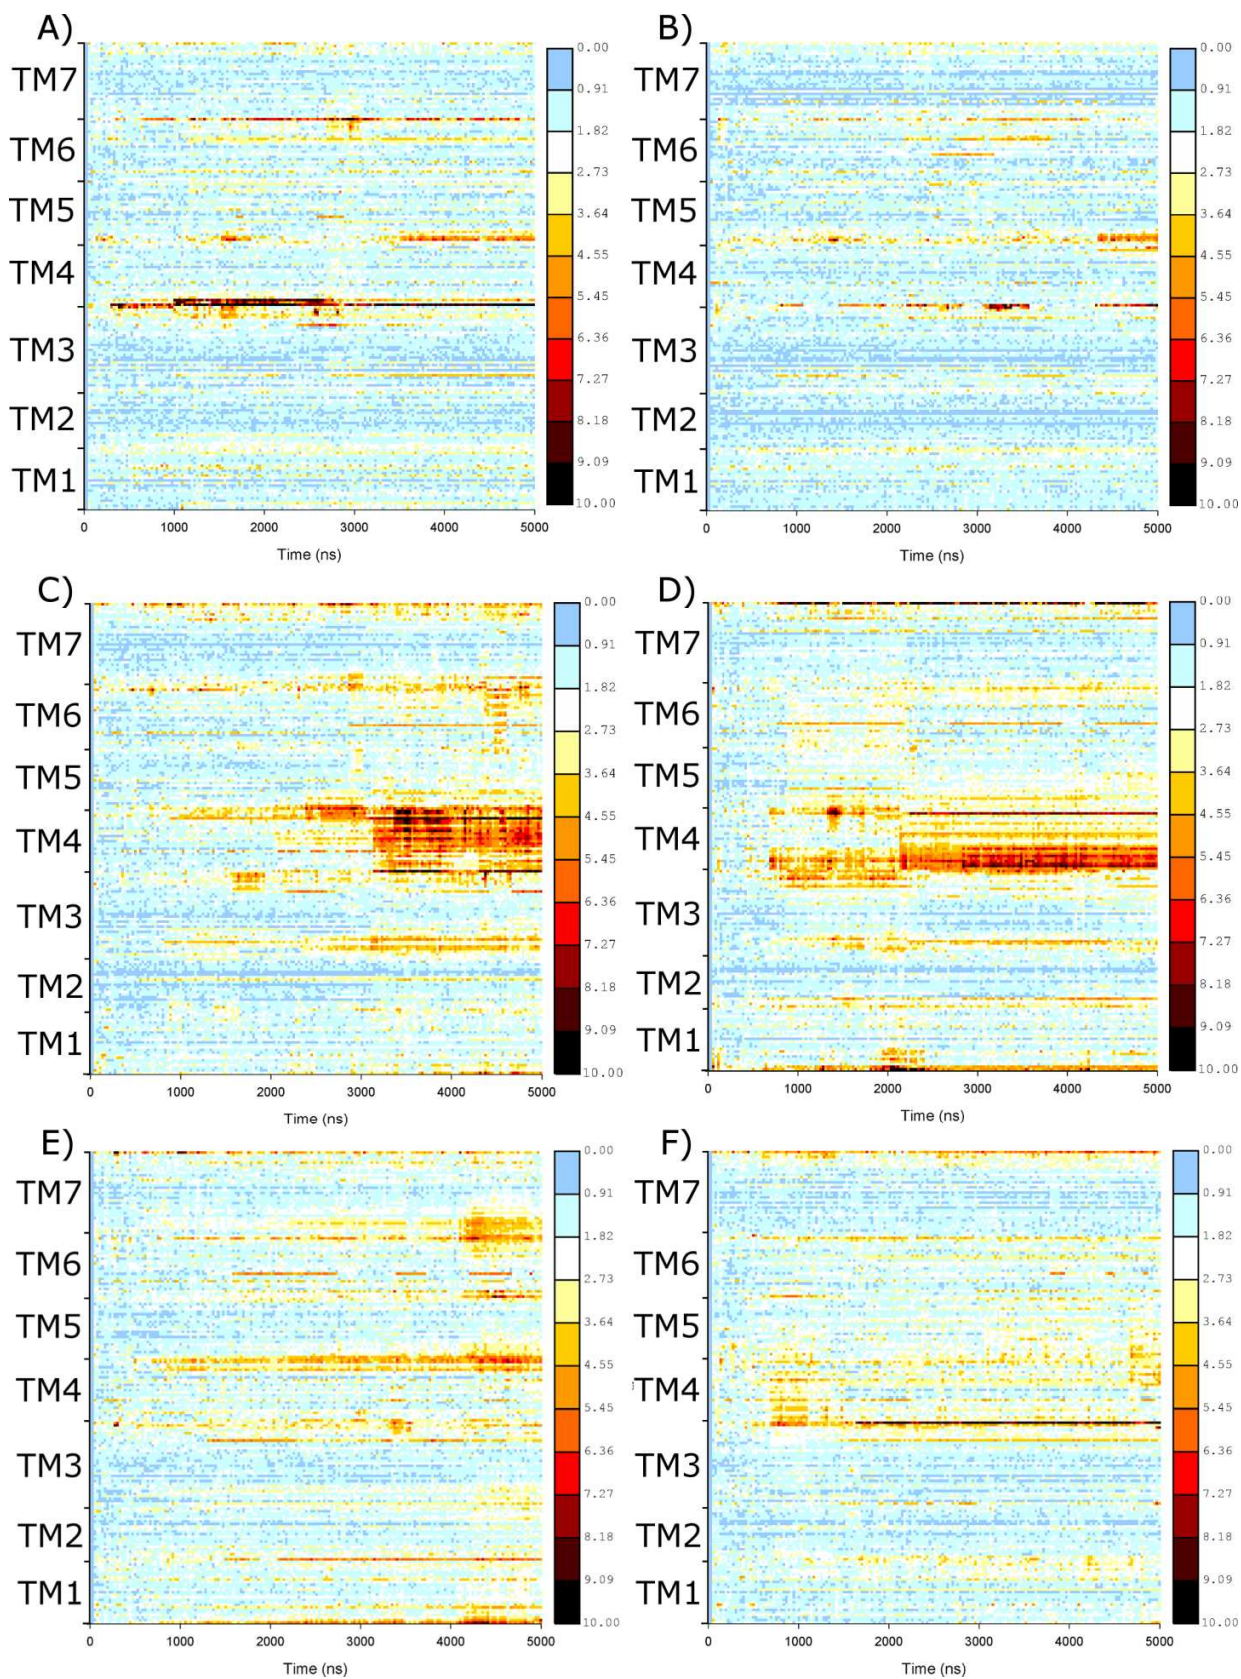

**SI Figure 3.** Conformational fluctuation heatmaps (RMSF of TM helix Cα atoms, normalized magnitude from 1 to 10) of: A) apo mGlu5, B) MPEP-bound mGlu5, C) and E) apo mGlu4, D) and F) MPEP-bound mGlu4, over respective 5  $\mu$ s MD simulations (mGlu4 MD simulations performed in duplicate; fluctuations calculated every 20 ns with respect to previous conformation).



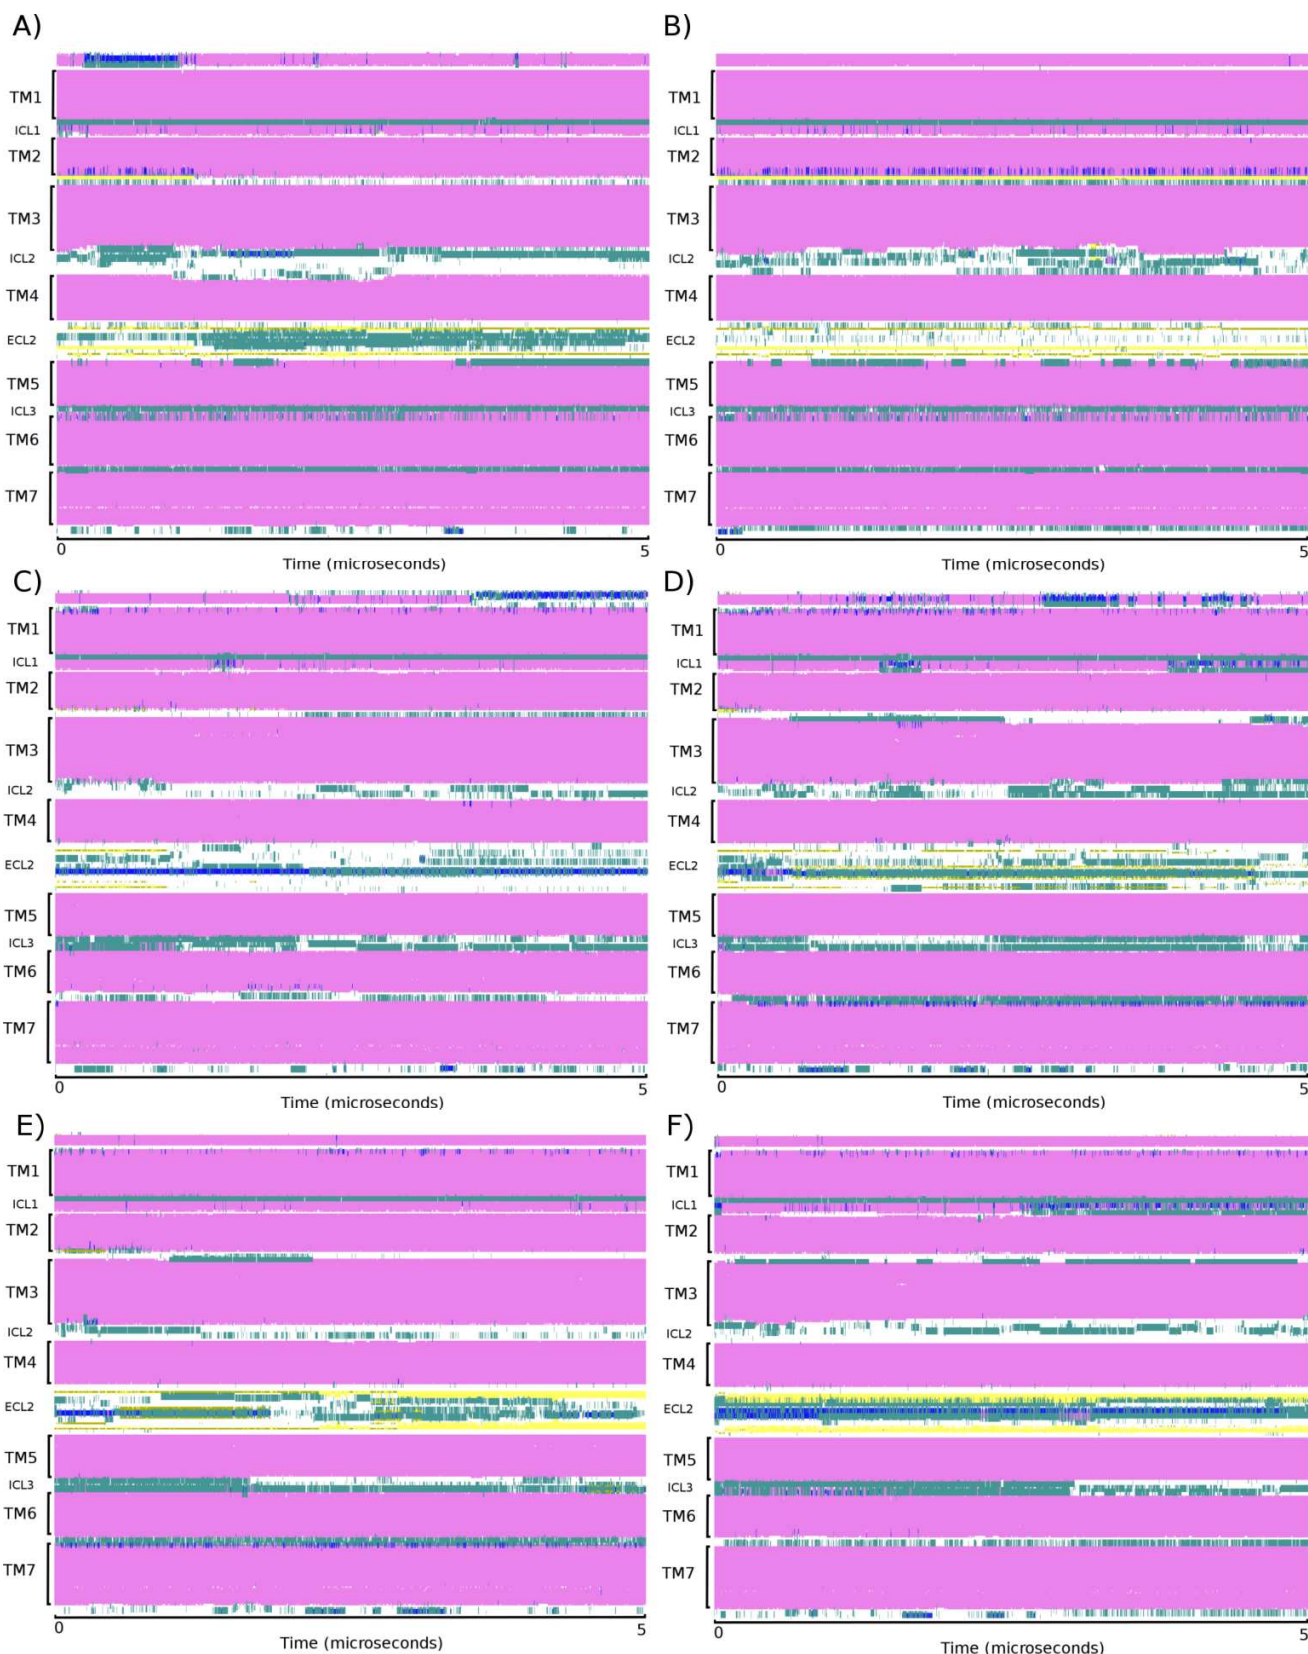

**SI Figure 4.** A secondary structure analysis of (a) apo mGlu5, (b) mGlu5 bound to MPEP, (c) and (e) apo mGlu4, (d) and (f) mGlu4 bound to MPEP, over respective MD simulations of 5 microseconds each (MD simulations of mGlu4 are duplicated). Colours: pink:  $\alpha$ -helix, blue: 310-helix, yellow: beta-strand, teal: turn, white: coil.

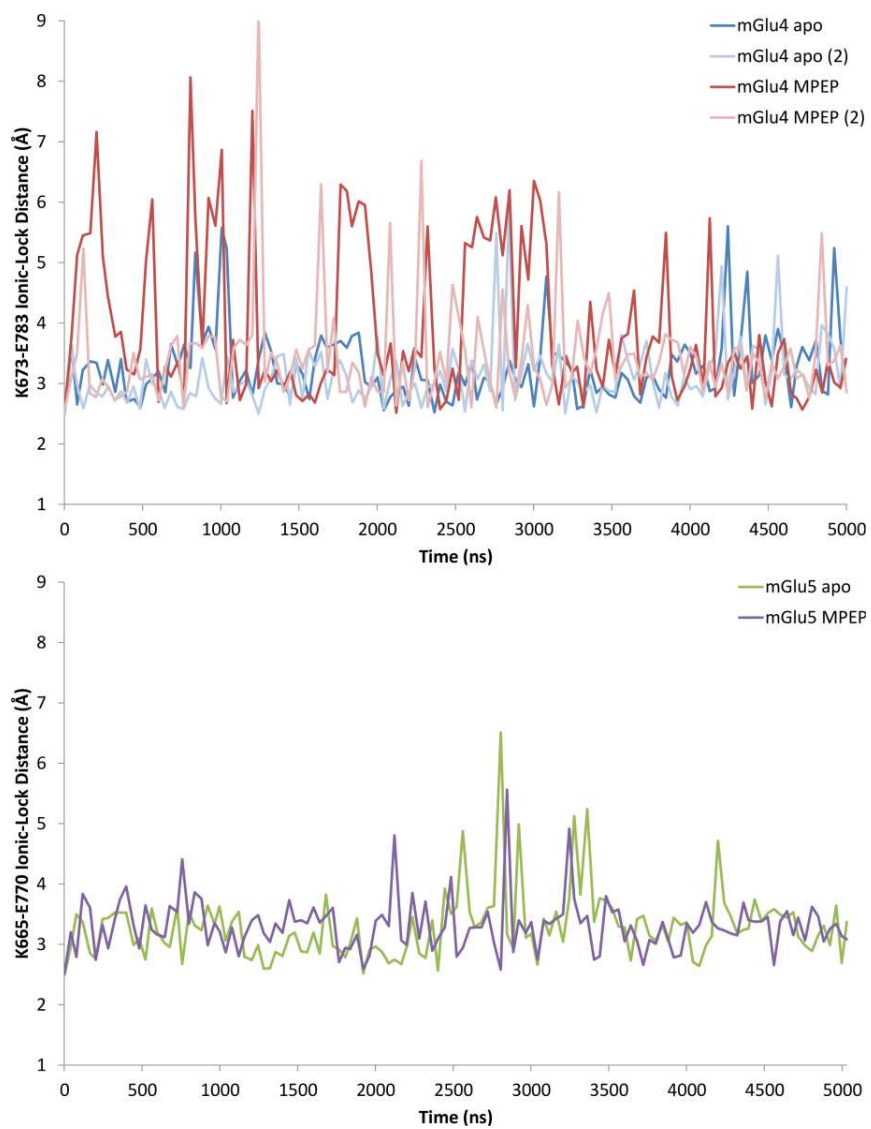

**SI Figure 5.** Top: ionic-lock distance in mGlu4 (N---O, K673-E783) and bottom: ionic-lock distance in mGlu5 (N---O, K665-E770) in respective 5 microsecond MD simulations, with and without bound allosteric modulator, MPEP. MD simulations of mGlu4 are duplicated.

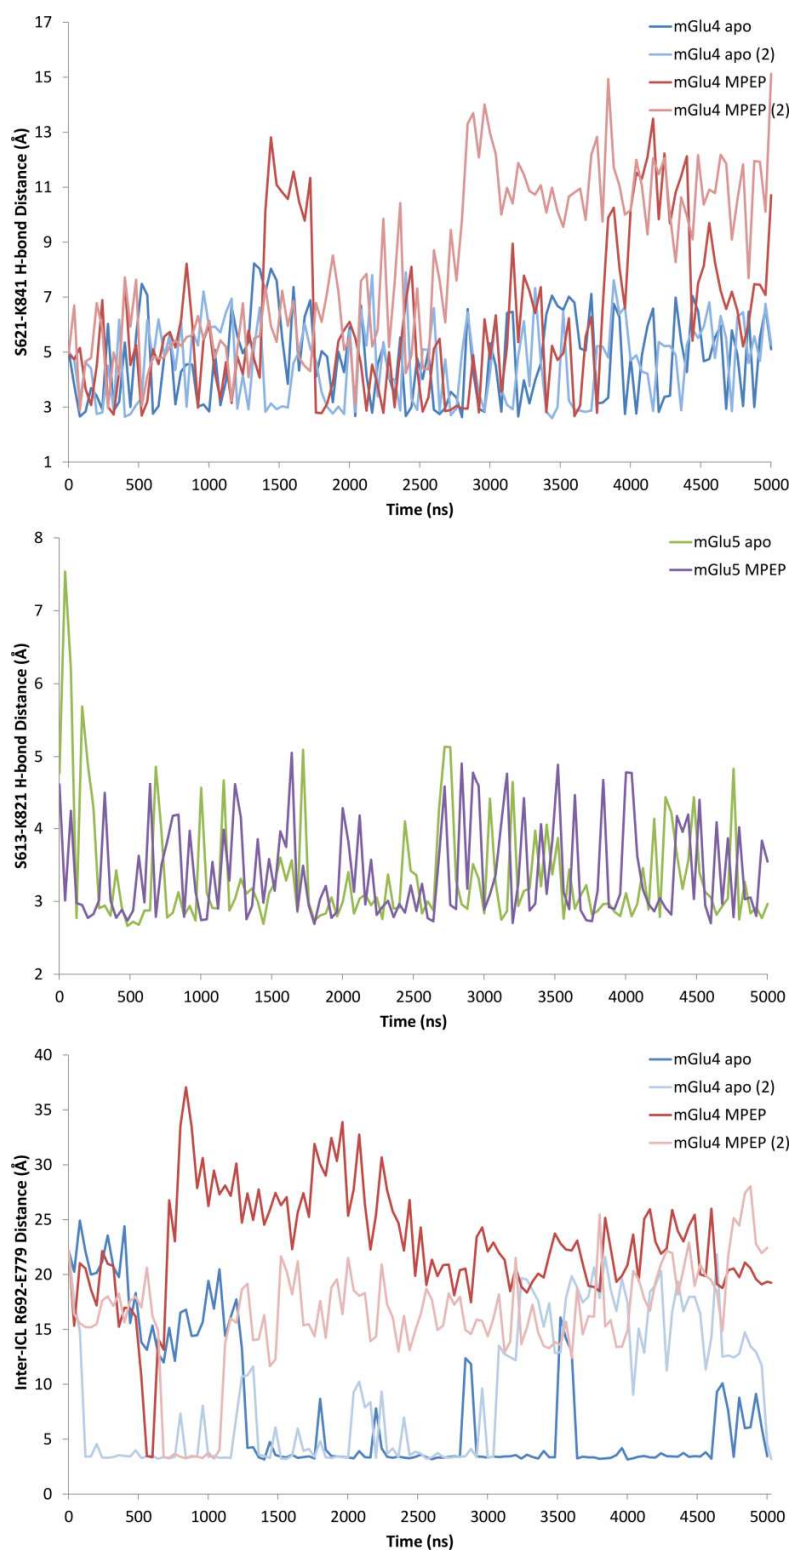

**SI Figure 6.** Additional intramolecular locking interactions observed in MD simulations of mGlu4 and mGlu5 performed with and without bound allosteric modulator, MPEP. Top: S621-K841 (ICL1-TM7) H-bond distance in mGlu4 (O---N); middle: S613-K821 (ICL1-TM7) H-bond distance in mGlu5 (O---N); bottom: inter-loop R692-E779 salt-bridge (ICL2-ICL3) in mGlu4. MD simulations of mGlu4 are duplicated (5 microseconds each).

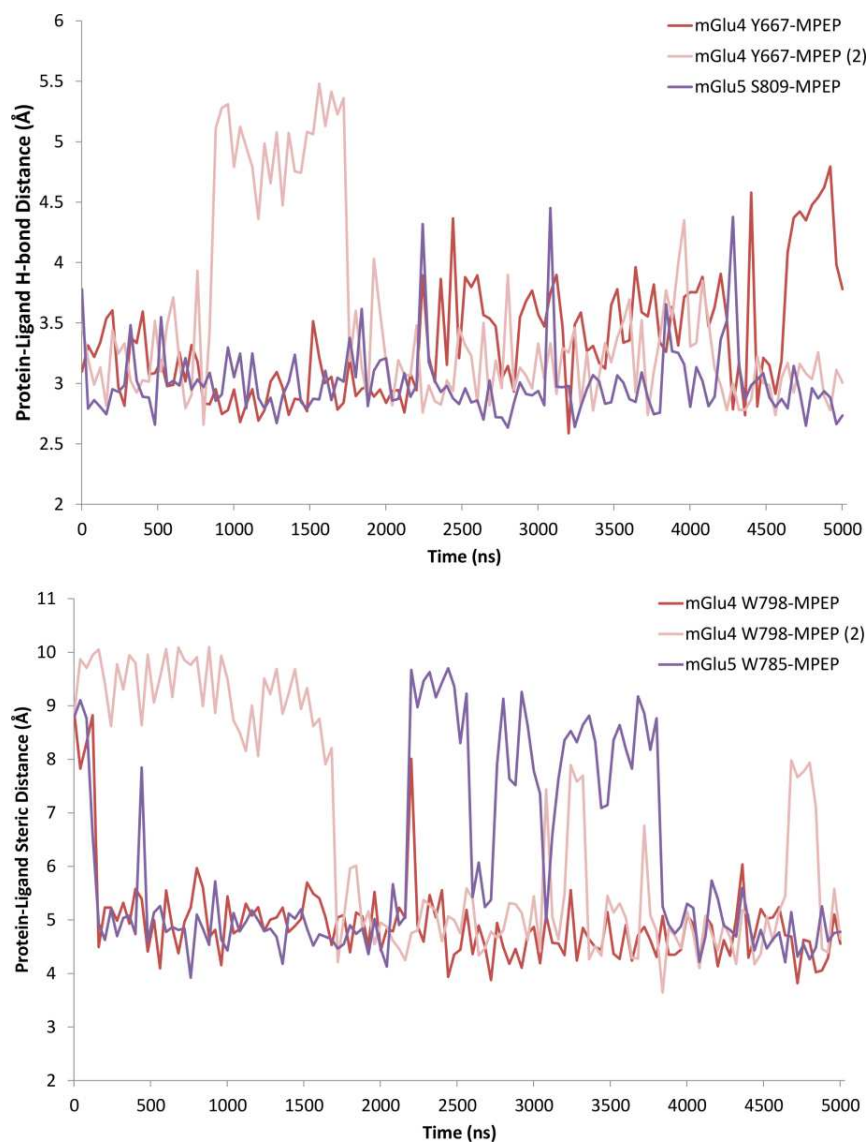

**SI Figure 7.** Assessment of observed protein-ligand interactions in MD simulations of mGlu4 and mGlu5 with bound allosteric modulator, MPEP, over 5 microseconds. Top: protein-ligand H-bond distances in mGlu4 (Y667-MPEP, O---N) and mGlu5 (S809-MPEP, O---N). Bottom: protein-ligand contact distances between MPEP and W798/W785<sup>6,50</sup> in MD simulations of mGlu4 and mGlu5, respectively (calculated between Trp sidechain N atom and MPEP centre of mass). MD simulations of mGlu4 are duplicated.



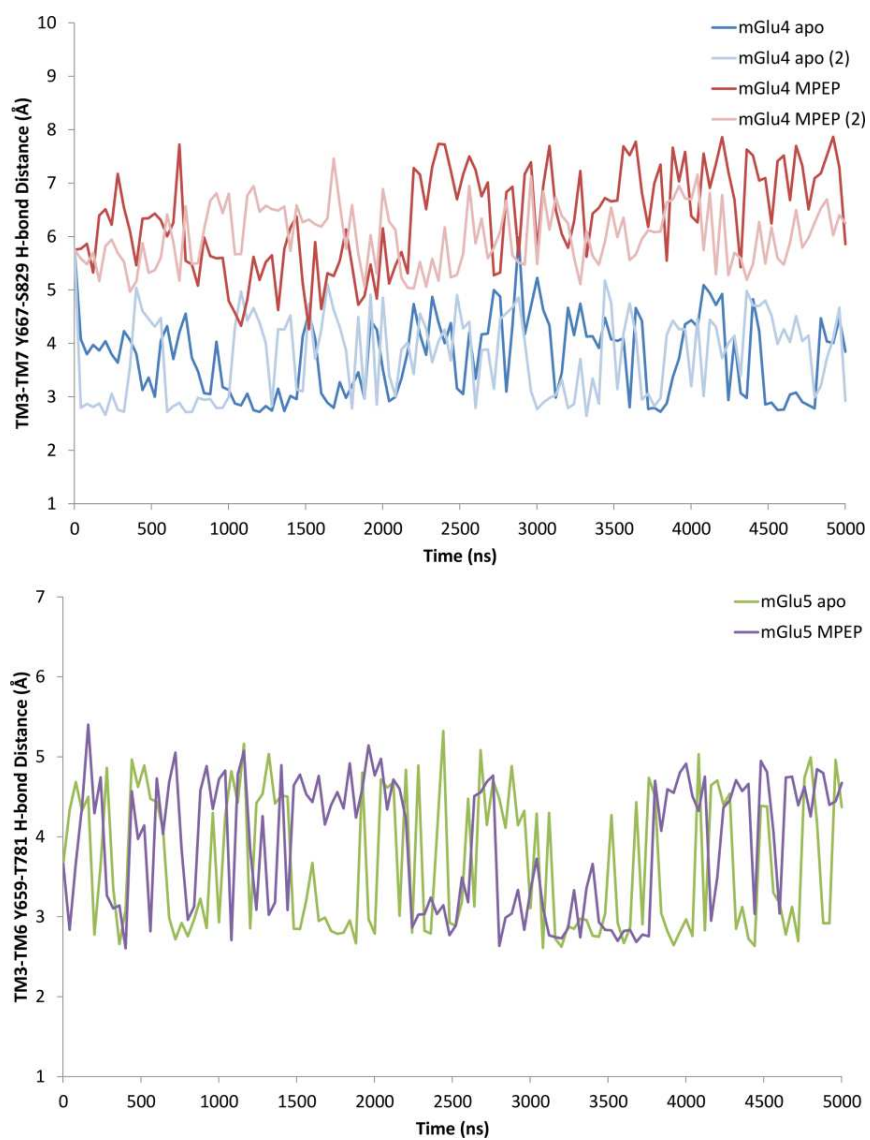

**SI Figure 8.** Assessment of observed H-bonds (or breakage) in TM domain cores of mGlu4 and mGlu5. MD simulations are performed with and without bound allosteric modulator, MPEP, over 5 microseconds each. Top: Y667-S829 (TM3-TM7) H-bond distance in mGlu4 (O---O); Bottom: Y659-T781 (TM3-TM6) H-bond distance in mGlu5 (O---O). MD simulations of mGlu4 are duplicated.



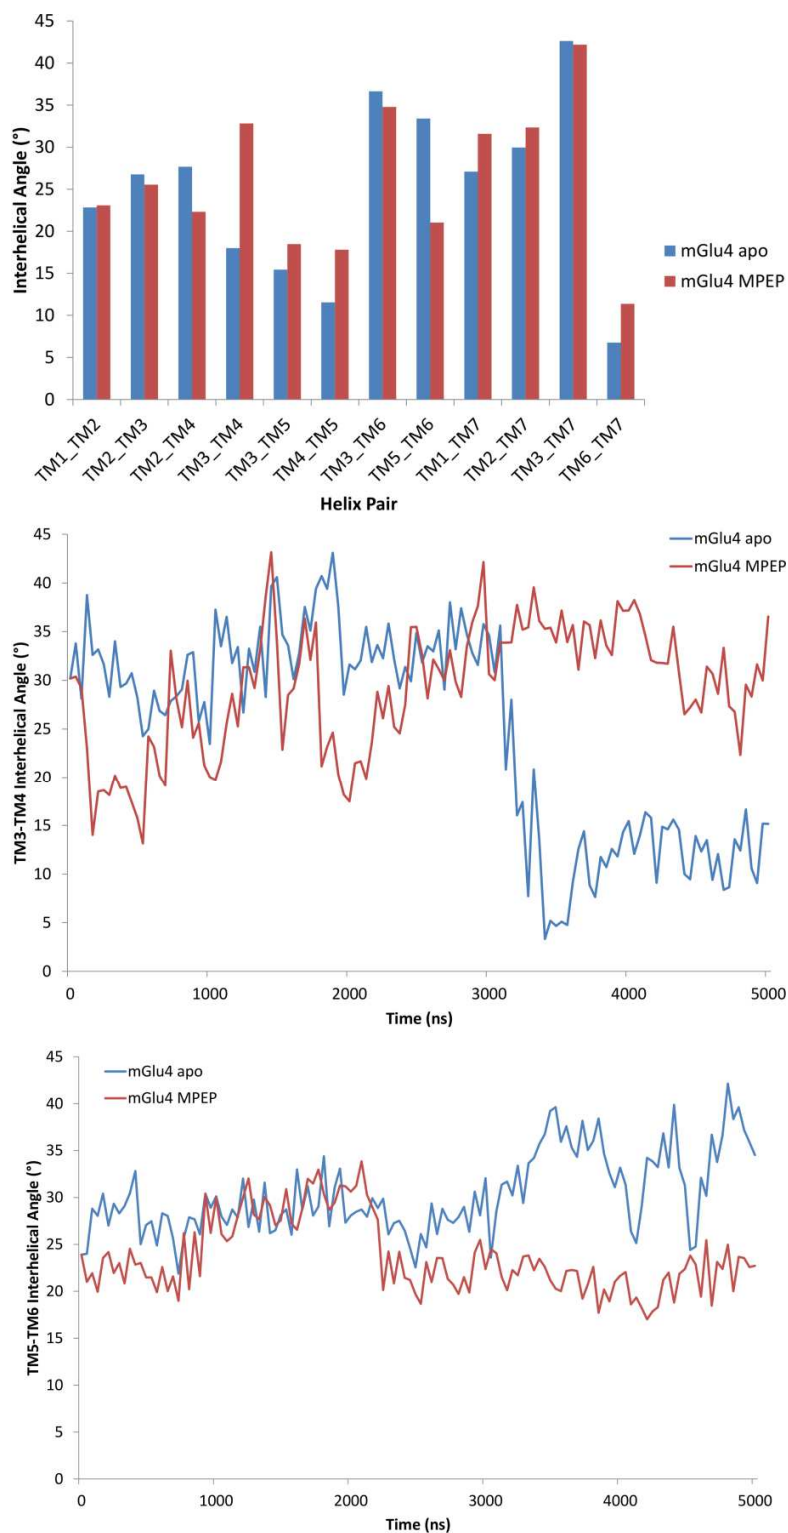

**SI Figure 9.** Comparison of inter-helical angles for quantification of TM domain conformational changes in mGlu4, with and without bound allosteric modulator, MPEP. (A) Twelve inter-helical angles (between helix pairs containing inter-helical vdW contacts) observed in average apo- and MPEP-bound mGlu4 states, retrieved from respective 5-microsecond MD simulations (average state calculated from second half of simulation). (B and C) Variation of TM3-TM4 (B) and TM5-TM6 (C) inter-helical angles observed during MD simulations of mGlu4 with and without bound MPEP.

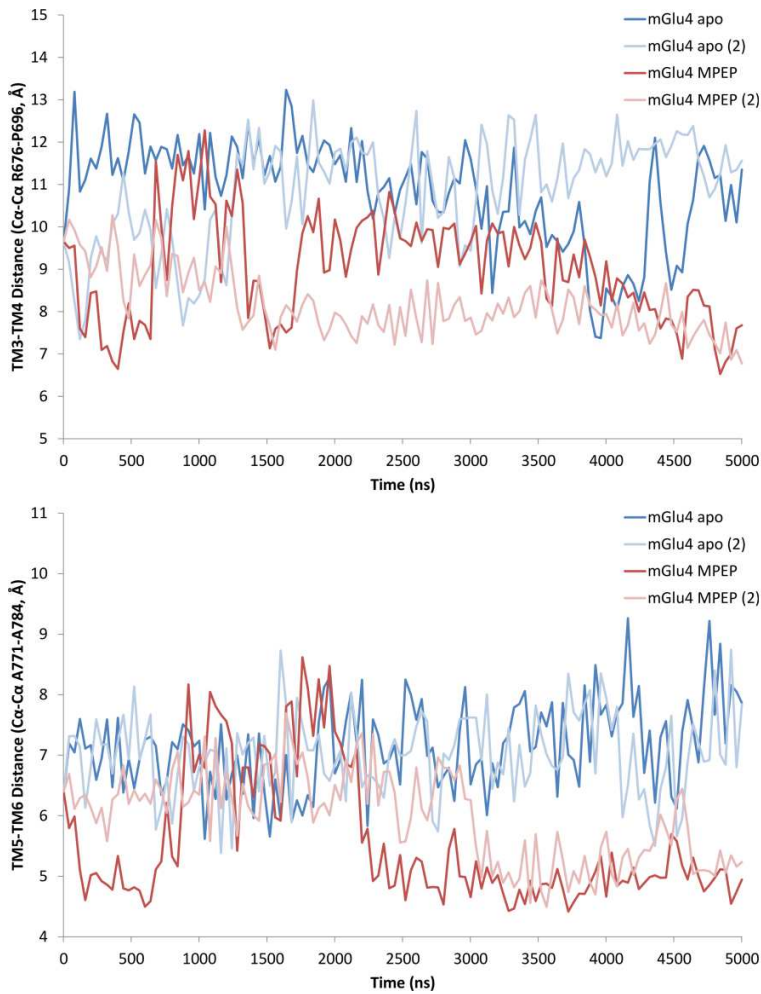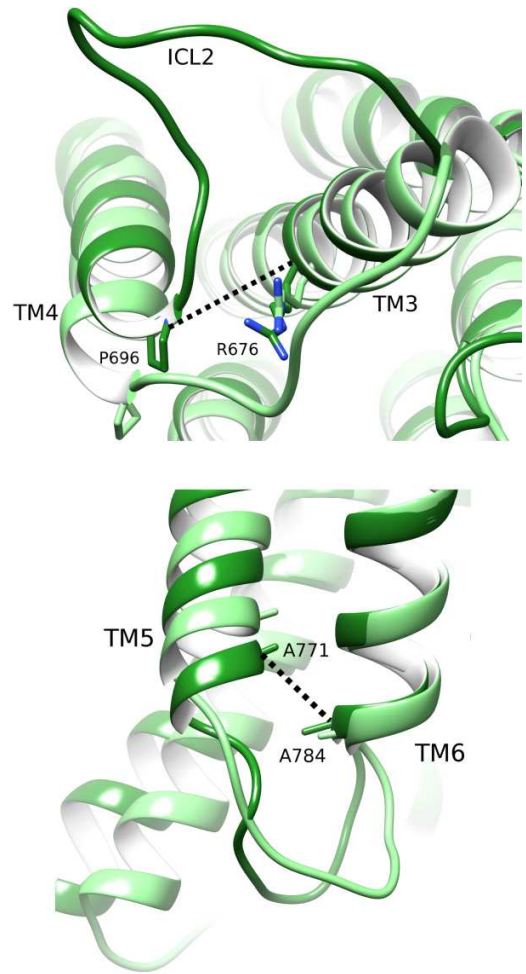

**SI Figure 10.** Comparison of inter-helical distances for quantification of TM domain conformational changes in mGlu4, with and without bound allosteric modulator, MPEP. Variation of TM3-TM4 (top) and TM5-TM6 (bottom) distances observed during respective 5-microsecond MD simulations of mGlu4, with and without bound MPEP. Inter-helical distances are measured at intracellular side between C $\alpha$  atoms of residue pairs: R676 and P696 (TM3-TM4), A771 and A784 (TM5-TM6). Corresponding structural images (right) show relevant inter-helical distances between average states of mGlu4, either MPEP-bound (dark green) or apo (light green), obtained from their respective 5-microsecond MD simulations.

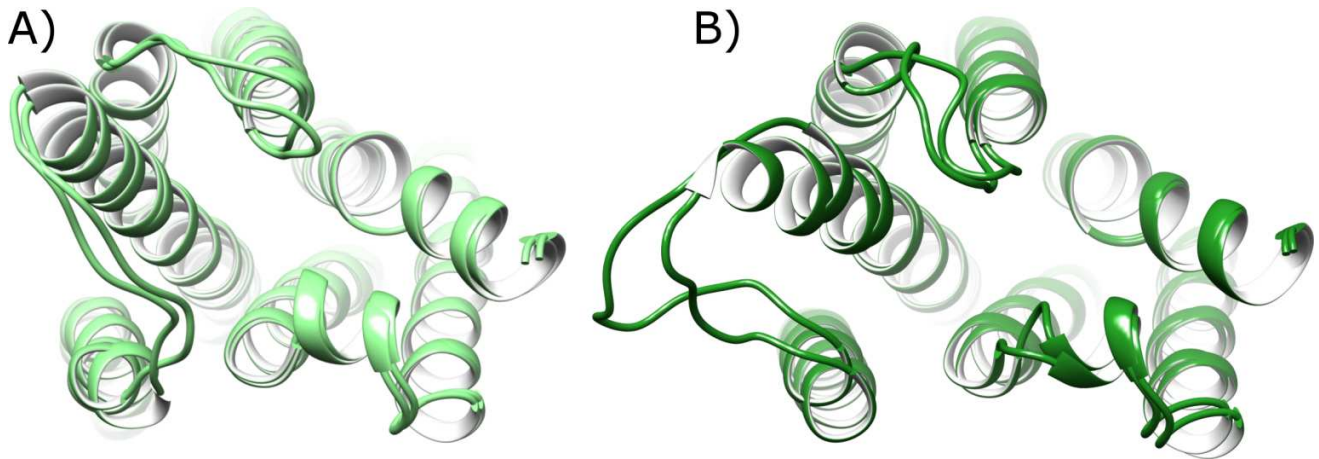

**SI Figure 11.** Comparison between intracellular conformations of duplicated average states of mGlu4 in: A) apo state (light green) or B) MPEP-bound (dark green), obtained from respective 5- $\mu$ s MD simulations (average conformations calculated from 2.5-5  $\mu$ s). Original and duplicated conformations are superimposed.

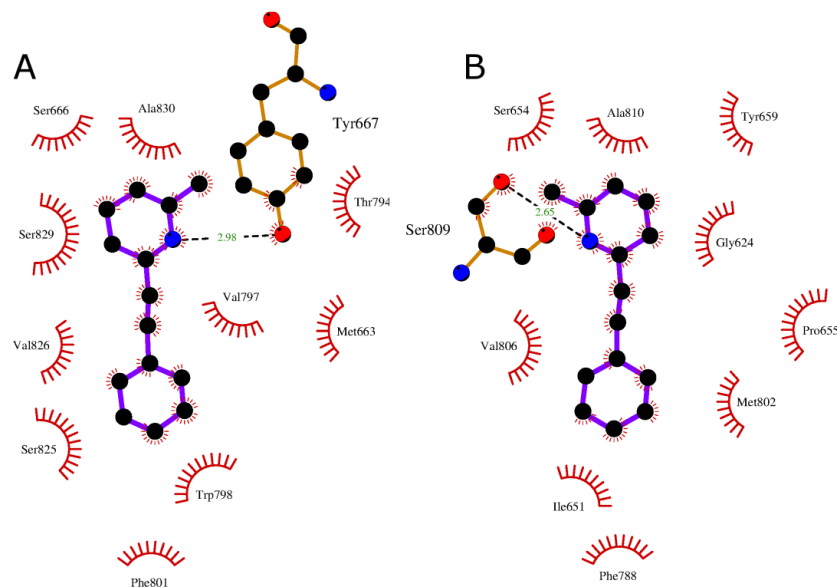

**SI Figure 12.** A 2-D comparison of average observed MPEP binding in MD simulations of (A) mGlu4 and (B) mGlu5.
